# Supplementary material for: MiR-503-5p mediates cell cycle arrest and fibrosis of peritoneal mesothelial cells with a high peritoneal solute transport status
Source: Research Square preprint supplement (doi:10.21203/rs.3.rs-6537719/v1), 2025-05-29
Supplement: Supplementary file 1 [file 1901f6f327b2ee43f4ce10e5.xlsx]

## Sheet: Tab1 
Age	Gender	Dialysis duration	4h D/Pcr	eGFR	Kt/V	IL-6
45	2	30	0.78	5	2.67	335.54
57	2	15	0.72	3	1.78	228.36
49	2	16	0.77	3	2.12	281.54
61	2	66	0.67	4	1.97	345.53
59	1	48	0.75	0	1.69	273.05
44	1	23	0.74	0	1.68	112.93
66	2	15	0.86	0	1.93	482.12
32	1	48	0.69	3.17	1.95	189.55
65	1	51	0.81	0	2.18	120.14
59	1	66	0.77	0	1.76	299.32
49	1	44	0.76	1.3	1.72	63.08
55	2	18	0.81	3.8	2.09	328.3
72	1	24	0.75	3.1	2.1	126.77
64	2	36	0.8	0	1.69	469.07
57	2	51	0.8	0	2.11	124.98
71	1	41	0.78	3.89	2.1	218.22
68	2	47	0.8	0	1.72	298.05
33	1	16	0.84	0	1.72	484.42
50	1	19	0.81	1.58	1.87	209.32
72	2	25	0.76	3.01	2.09	460.22
71	1	54	0.63	0	1.72	148.49
62	1	26	0.53	3	1.86	188.42
69	2	46	0.64	0	1.71	58.03
69	2	56	0.6	5.38	2.42	43.26
44	2	35	0.51	3.03	2.15	73.75
56	2	22	0.62	0	1.78	172.8
44	1	39	0.62	3.85	2.16	220.65
62	2	38	0.58	0	1.67	128.62
35	2	30	0.46	2	1.68	460.65
62	2	43	0.59	2.1	1.78	98.07
46	2	16	0.6	3.28	2.46	339.9
62	2	43	0.59	2.1	1.78	183.34
36	1	28	0.64	6.9	2.27	168.07
56	1	40	0.54	0	1.71	97.3
56	1	38	0.62	3.45	1.98	140.95
61	1	25	0.59	3.43	1.99	174.98
50	1	14	0.61	1.54	1.79	270.46
50	2	37	0.54	1.43	1.78	86.81
46	2	25	0.6	1.68	1.89	271.04
41	1	63	0.62	0.2	1.73	152.98

## Sheet: Fig 2
内参					目的基因
分组	基因	CT	CT MEAN		分组	基因	CT	Delta Ct	平均值	Delta Delta Ct=目的-平均	2-
NC	U6	13.1998	13.1051		NC	503	26.9297	13.8246		0.344423	0.787623
NC	U6	13.1384	13.1051		NC	503	26.4489	13.3438		-0.136425	1.09918
NC	U6	12.977	13.1051		NC	503	26.3773	13.2722	13.4802	-0.207997	1.15508
100NG	U6	12.9397	12.851		100NG	503	25.3798	12.5288		-0.951383	1.93373
100NG	U6	12.8814	12.851		100NG	503	25.2488	12.3978		-1.0824	2.11756
100NG	U6	12.7318	12.851		100NG	503	25.5144	12.6634		-0.816824	1.76152
5NG	U6	12.6233	12.5049		5NG	503	26.665	14.1601		0.679892	0.624212
5NG	U6	12.3661	12.5049		5NG	503	26.4092	13.9043		0.424126	0.74529
5NG	U6	12.5252	12.5049		5NG	503	26.7198	14.2149		0.734735	0.600929
10NG	U6	12.7209	12.6551		10NG	503	26.6331	13.978		0.497836	0.708168
10NG	U6	12.4918	12.6551		10NG	503	26.5835	13.9284		0.448229	0.732942
10NG	U6	12.7525	12.6551		10NG	503	26.6459	13.9909		0.510664	0.701899
NC	5NG	10NG	100NG
0.787623	0.624212	0.708168	1.93373
1.09918	0.74529	0.732942	2.11756
1.15508	0.600929	0.701899	1.76152
50UG	U6	12.6117	12.5128		50UG	503	26.0742	13.5613		0.0732365	0.950503
50UG	U6	12.504	12.5128		50UG	503	25.9277	13.4149		-0.0732365	1.05207
50UG	U6	12.4228	12.5128		50UG	503	25.9832	13.4703	13.4881	-0.0177536	1.01238

## Sheet: Fig4
FIGURE4A
内参					目的基因
分组	基因	CT	CT MEAN		分组	基因	CT	Delta Ct	平均值	Delta Delta Ct=目的-平均	2-
MNC	U6	9.87906	9.9024		MNC	503	23.4253	13.5229		0.0410856	0.971923
MNC	U6	9.99125	9.9024		MNC	503	23.3834	13.481		-0.000740687	1.00051
MNC	U6	9.83689	9.9024		MNC	503	23.3438	13.4414	13.4818	-0.0403449	1.02836
MIC	U6	9.92117	9.943		MIC	503	11.2671	1.32415		-12.1576	4568.91
MIC	U6	10.0735	9.943		MIC	503	10.985	1.04203		-12.4398	5555.71
MIC	U6	9.83435	9.943		MIC	503	11.2466	1.30356		-12.1782	4634.58
INC	U6	9.84462	9.71305		INC	503	21.9075	12.1944		0.0873998	0.941218
INC	U6	9.75105	9.71305		INC	503	21.7684	12.0554		-0.0516478	1.03645
INC	U6	9.54348	9.71305		INC	503	21.7843	12.0713	12.107	-0.035752	1.02509
INH	U6	10.8123	10.7654		INH	503	25.5817	14.8163		2.70925	0.15291
INH	U6	10.717	10.7654		INH	503	25.5009	14.7355		2.62849	0.161713
INH	U6	10.7669	10.7654		INH	503	25.5634	14.798		2.691	0.154856
MNC	MIC					INC	INH
0.971923	4568.91					0.941218	0.15291
1.00051	5555.71					1.03645	0.161713
1.02836	4634.58					1.02509	0.154856
FIGURE4B
FIGURE4C
	MNC			Mimic			INC			Inhibitor
G0/G1	52.75	50	51	60.11	58.11	61.09	52.89	51.37	51.11	52.43	52.56	53.18
S	25.35	24.93	25.7	19.82	20.42	20.31	24.02	25.19	25.21	24.63	24.89	25.09
G2/M	21.89	21	21.5	18.07	19.07	18.88	23.1	24.23	24.33	22.94	23.67	24.05

## Sheet: Fig 5
FIGURE5C
内参					目的基因
分组	基因	CT	CT MEAN		分组	基因	CT	Delta Ct	平均值	Delta Delta Ct=目的-平均	2-
MNC	u6	11.7975	11.8193		MNC	503	25.7748	13.9555		0.0706857	0.952185
MNC	u6	11.9253	11.8193		MNC	503	25.7103	13.891		0.00621351	0.995702
MNC	u6	11.7352	11.8193		MNC	503	25.6272	13.8079	13.8848	-0.0768992	1.05475
MIMIC	u6	10.7911	11.2477		MIMIC	503	11.9385	0.690776		-13.194	9371.06
MIMIC	u6	11.2438	11.2477		MIMIC	503	12.2495	1.00176		-12.883	7553.93
MIMIC	u6	11.7082	11.2477		MIMIC	503	12.0028	0.755083		-13.1297	8962.52
INC	u6	11.0732	13.1079		INC	503	25.2893	12.1814		0.480274	0.716842
INC	u6	16.931	13.1079		INC	503	24.5975	11.4896		-0.211543	1.15793
INC	u6	11.3195	13.1079		INC	503	24.5403	11.4324	11.7011	-0.268731	1.20475
INH	u6	12.2451	12.1075		INH	503	25.7756	13.6682		1.96703	0.255778
INH	u6	12.0879	12.1075		INH	503	25.7052	13.5977		1.89657	0.268582
INH	u6	11.9894	12.1075		INH	503	25.7074	13.6		1.89882	0.268163
FIGURE5D
内参					目的基因
分组	基因	CT	CT MEAN		分组	基因	CT	Delta Ct	平均值	Delta Delta Ct=目的-平均	2-
MNC	b-actin	11.2178	12.3033		MNC	ccnd1	21.3917	9.08834		-0.18985	1.14065
MNC	b-actin	13.6779	12.3033		MNC	ccnd1	21.4904	9.18703		-0.0911624	1.06523
MNC	b-actin	12.0143	12.3033		MNC	ccnd1	21.8625	9.55921	9.27819	0.281013	0.823013
MIMIC	b-actin	12.7438	12.4433		MIMIC	ccnd1	23.5246	11.0813		1.80307	0.286564
MIMIC	b-actin	12.6985	12.4433		MIMIC	ccnd1	23.7755	11.3322		2.05399	0.240817
MIMIC	b-actin	11.8877	12.4433		MIMIC	ccnd1	23.9714	11.528		2.24985	0.210246
INC	b-actin	13.4879	12.9188		INC	ccnd1	23.033	10.1142		-0.124969	1.09048
INC	b-actin	13.2124	12.9188		INC	ccnd1	23.0675	10.1487		-0.0904802	1.06472
INC	b-actin	12.0562	12.9188		INC	ccnd1	23.3735	10.4546	10.2392	0.215449	0.861278
INH	b-actin	13.4177	13.3327		INH	ccnd1	23.2507	9.91799		-0.321168	1.24934
INH	b-actin	13.1832	13.3327		INH	ccnd1	23.4688	10.1361		-0.10304	1.17403
INH	b-actin	13.3973	13.3327		INH	ccnd1	23.5705	10.2378		-0.0013326	1.17092
FIGURE5E
		mnc		mimic
ccnd1		88750.1		44770.3
ccnd2		88060.6		47982.8
ccnd3		88232.8		48298.5
actin1		60585		160902
actin2		61110.9		160380
actin3		60239.5		161252
ccnd/actin		1.46489		0.278246
		1.441		0.299182
		1.4647		0.299522
FIGURE5F
		inc		inh
ccnd1	1	78868.8	2	142588
ccnd2	1	80263	2	141186
ccnd3	1	83151.6		148488
actin1		84648		136800
actin2	1	84541.8		136910
actin3	1	82956.4	2	138504
ccnd/actin		0.931727		1.04231
		0.949389		1.03123
		1.00235		1.07208

## Sheet: Fig 6
FIGURE6A
内参					目的基因
分组	基因	CT	CT MEAN		分组	基因	CT	Delta Ct	平均值	Delta Delta Ct=目的-平均	2-
MNC	U6	9.87906	9.9024		MNC	503	23.4253	13.5229		0.0410856	0.971923
MNC	U6	9.99125	9.9024		MNC	503	23.3834	13.481		-0.000740687	1.00051
MNC	U6	9.83689	9.9024		MNC	503	23.3438	13.4414	13.4818	-0.0403449	1.02836
MIMIC	U6	10.6926	10.646		MIMIC	503	11.7018	1.05581		-12.426	5502.9
MIMIC	U6	10.6375	10.646		MIMIC	503	11.5776	0.931665		-12.5501	5997.39
MIMIC	U6	10.6079	10.646		MIMIC	503	11.5934	0.947399		-12.5344	5932.34
INC	U6	9.84462	9.71305		INC	503	21.9075	12.1944		0.0873998	0.941218
INC	U6	9.75105	9.71305		INC	503	21.7684	12.0554		-0.0516478	1.03645
INC	U6	9.54348	9.71305		INC	503	21.7843	12.0713	12.107	-0.035752	1.02509
INH	U6	11.1806	11.2115		INH	503	25.0945	13.8831		1.77603	0.291987
INH	U6	11.1455	11.2115		INH	503	24.9799	13.7685		1.66144	0.316124
INH	U6	11.3083	11.2115		INH	503	25.0525	13.841		1.73398	0.300621
FIGURE6B
MNC	B-ACTIN	11.3001	11.3033		MNC	SMA	20.6632	9.35995		0	1
MNC	B-ACTIN	11.3065	11.3033		MNC	SMA	20.6632	9.35995		0	1
MNC	B-ACTIN	fale	11.3033		MNC	SMA	20.6632	9.35995	9.35995	0	1
MIMIC	B-ACTIN	11.6506	11.7707		MIMIC	SMA	19.8855	8.11484		-1.24512	2.37038
MIMIC	B-ACTIN	11.8908	11.7707		MIMIC	SMA	19.7218	7.95114		-1.40882	2.65519
MIMIC	B-ACTIN		11.771		MIMIC	SMA	19.8037	8.03265		-1.3273	2.50933
INC	B-ACTIN	12.9202	12.9408		INC	SMA	19.6294	6.68858		0.179817	0.882815
INC	B-ACTIN	12.8805	12.9408		INC	SMA	19.2697	6.32895		-0.179817	1.13274
INC	B-ACTIN	13.0216	12.9408		INC	SMA	19.4495	6.50876	6.50876	0	1
INH	B-ACTIN	12.7907	12.9003		INH	SMA	21.2049	8.30466		1.7959	0.287992
INH	B-ACTIN	12.8807	12.9003		INH	SMA	20.9781	8.07785		1.56908	0.337022
INH	B-ACTIN	13.0294	12.9003		INH	SMA	20.6764	7.77611		1.26735	0.415423
MNC	B-ACTIN	11.3001	11.3033		MNC	COL1A1	18.7989	7.49567		-0.254513	1.19293
MNC	B-ACTIN	11.3065	11.3033		MNC	COL1A1	19.308	8.0047		0.254513	0.83827
MNC	B-ACTIN	fale	11.3033		MNC	COL1A1	19.0535	7.75019	7.75019	0	1
MIMIC	B-ACTIN	11.6506	11.7707		MIMIC	COL1A1	18.9172	7.14658		-0.603603	1.51951
MIMIC	B-ACTIN	11.8908	11.7707		MIMIC	COL1A1	18.7313	6.96067		-0.789518	1.7285
MIMIC	B-ACTIN		11.771		MIMIC	COL1A1	18.8243	7.05329		-0.696897	1.62101
INC	B-ACTIN	12.9202	12.9408		INC	COL1A1	18.9349	5.99414		0.299395	0.812593
INC	B-ACTIN	12.8805	12.9408		INC	COL1A1	18.3361	5.39535		-0.299395	1.23063
INC	B-ACTIN	13.0216	12.9408		INC	COL1A1	18.6355	5.69474	5.69474	0	1
INH	B-ACTIN	12.7907	12.9003		INH	COL1A1	20.1632	7.26295		1.56821	0.337227
INH	B-ACTIN	12.8807	12.9003		INH	COL1A1	20.4682	7.56792		1.87318	0.272971
INH	B-ACTIN	13.0294	12.9003		INH	COL1A1	20.222	7.32174		1.62699	0.323762
FIGURE6C
sma		mnc		mimic		inc		inhibitor
1	1	62050	2	159383	2	76744.2	1	60236.4
2	1	67947.4	2	153469	2	72655.9	1	65698.4
3	1	61634.3	2	159807	2	73168.3	1	62187.5
gapdh
1	1	77571.9	2	143882	1	95220.2	2	96829.6
2	1	77977.1	2	143475	1	94956.8	2	97091.6
3	1	79381.2	2	142067	1	96228.9	2	95810.1
		0.799903		1.10773		0.805965		0.622087
		0.871376		1.06965		0.765147		0.676664
		0.776435		1.12487		0.760357		0.64907
		0.815905				0.777157
均一化		0.980388		1.35768		1.03707		0.800465
		1.06799		1.311		1.08455		0.870692
		0.951624		1.37868		0.928383		0.835186
FIGURE6D
col		mnc		mimic			inc		inh
1	1	61220.3	2	160248		2	134940	1	63577.3
2	1	62088.3	2	159372		2	135324	1	63546.9
3	1	60093.2	2	161380		2	136322	1	67025.7
GAPDH
1	2	81035.9	1	140403		1	137865	2	104181
2	2	82906.3	1	138528		1	137904	2	101201
3	2	83387	1	138043		1	134403	2	110612
		0.755471		1.14134			0.978781		0.610259
		0.748898		1.15046			0.981289		0.627926
		0.720654		1.16905			1.01428		0.605955
		0.741674					0.99145
		1.0186		1.53887			0.987221		0.615522
		1.00974		1.55117			0.989751		0.633341
		0.971658		1.57624			1.12303		0.65118
