# Supplementary figures and images for: MiR-503-5p mediates cell cycle arrest and fibrosis of peritoneal mesothelial cells with a high peritoneal solute transport status
Source: Research Square preprint supplement (doi:10.21203/rs.3.rs-6537719/v1), 2025-05-29

Figure 5


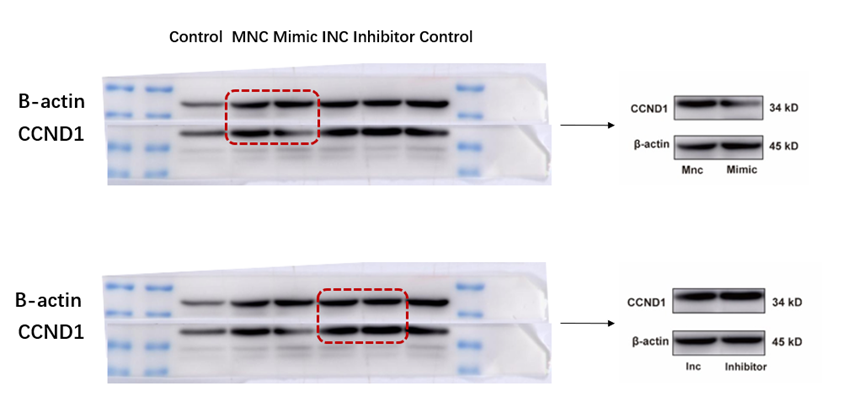


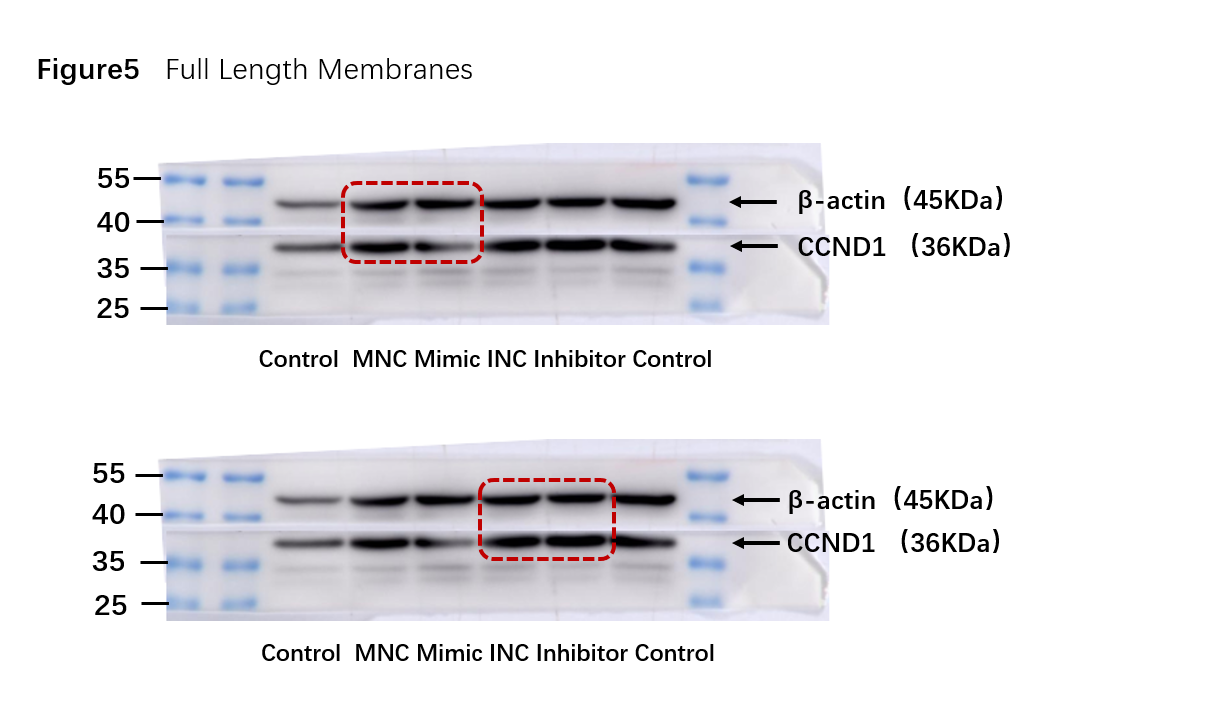

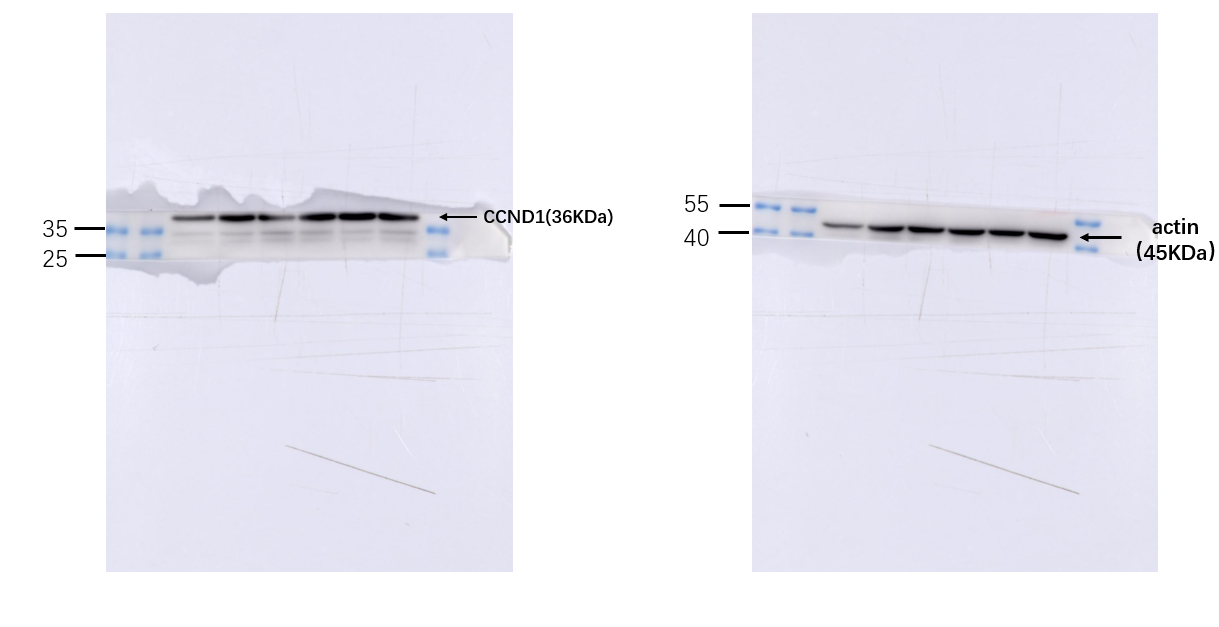


**Figure 6 C**


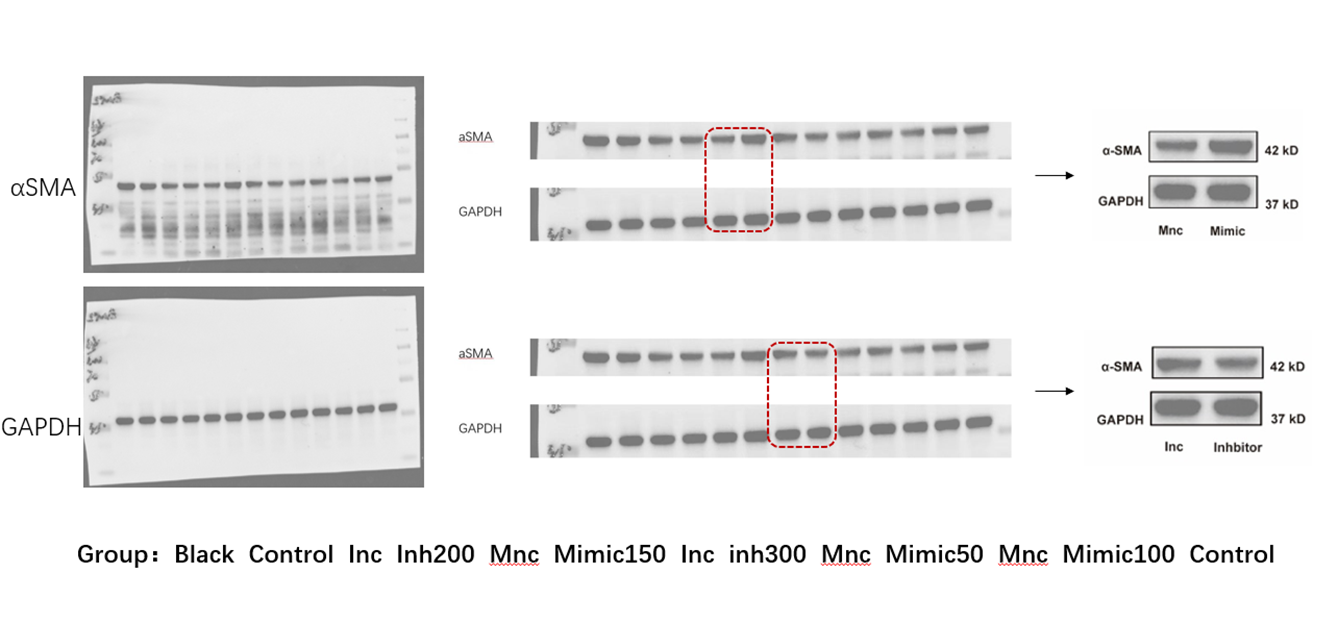


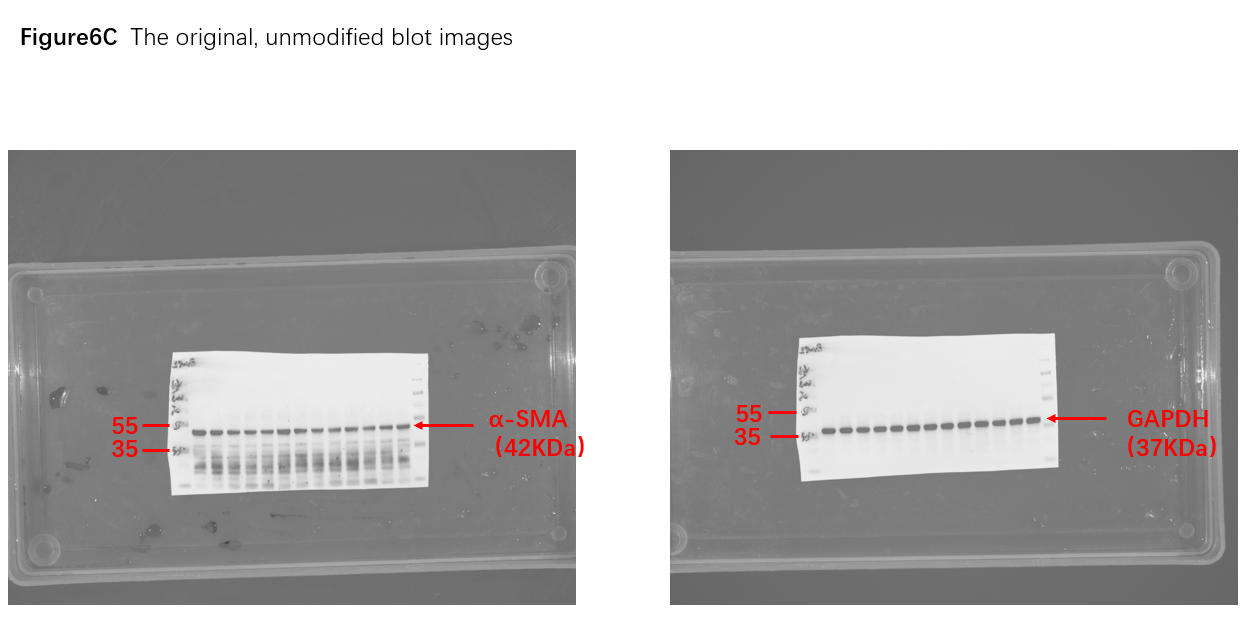

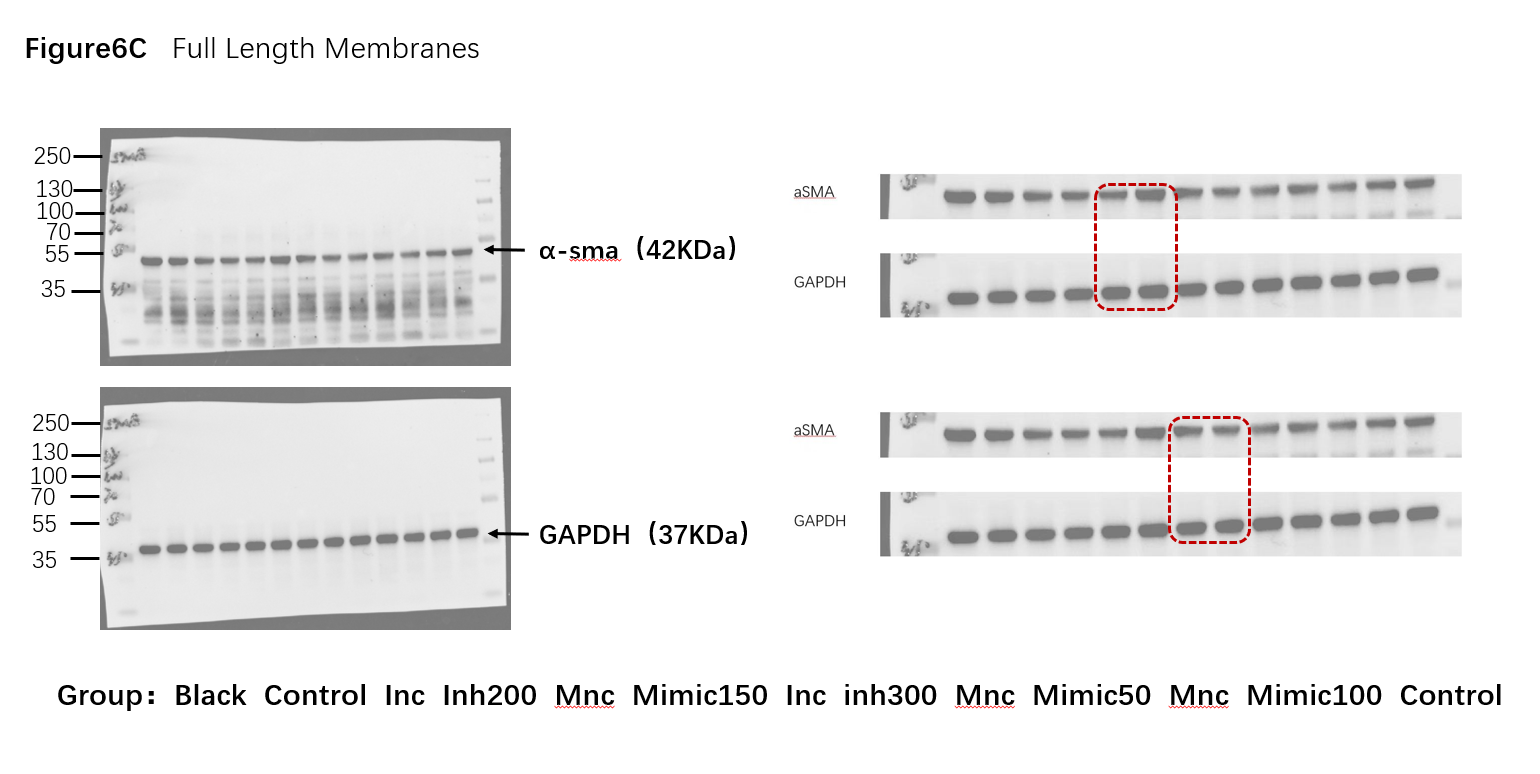


**Figure 6D**


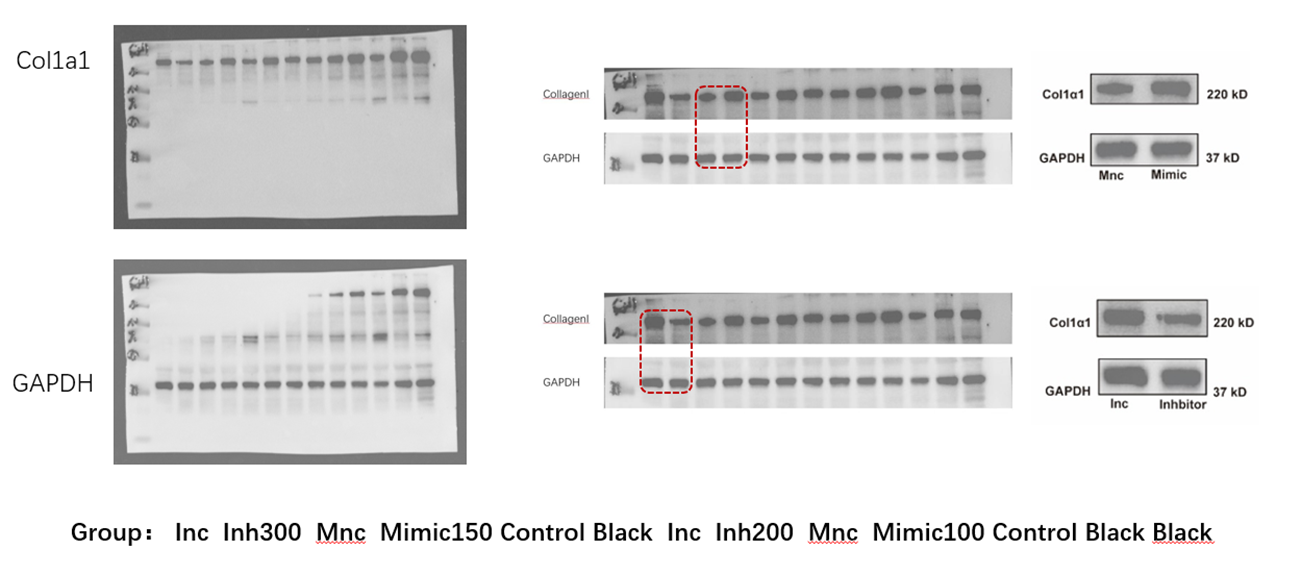


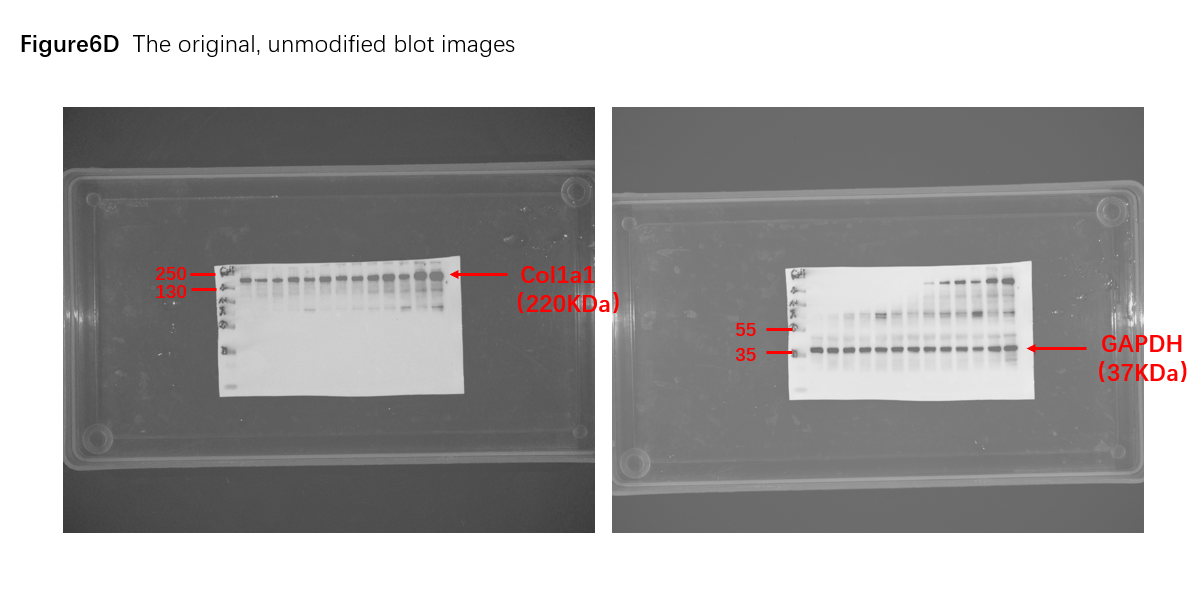

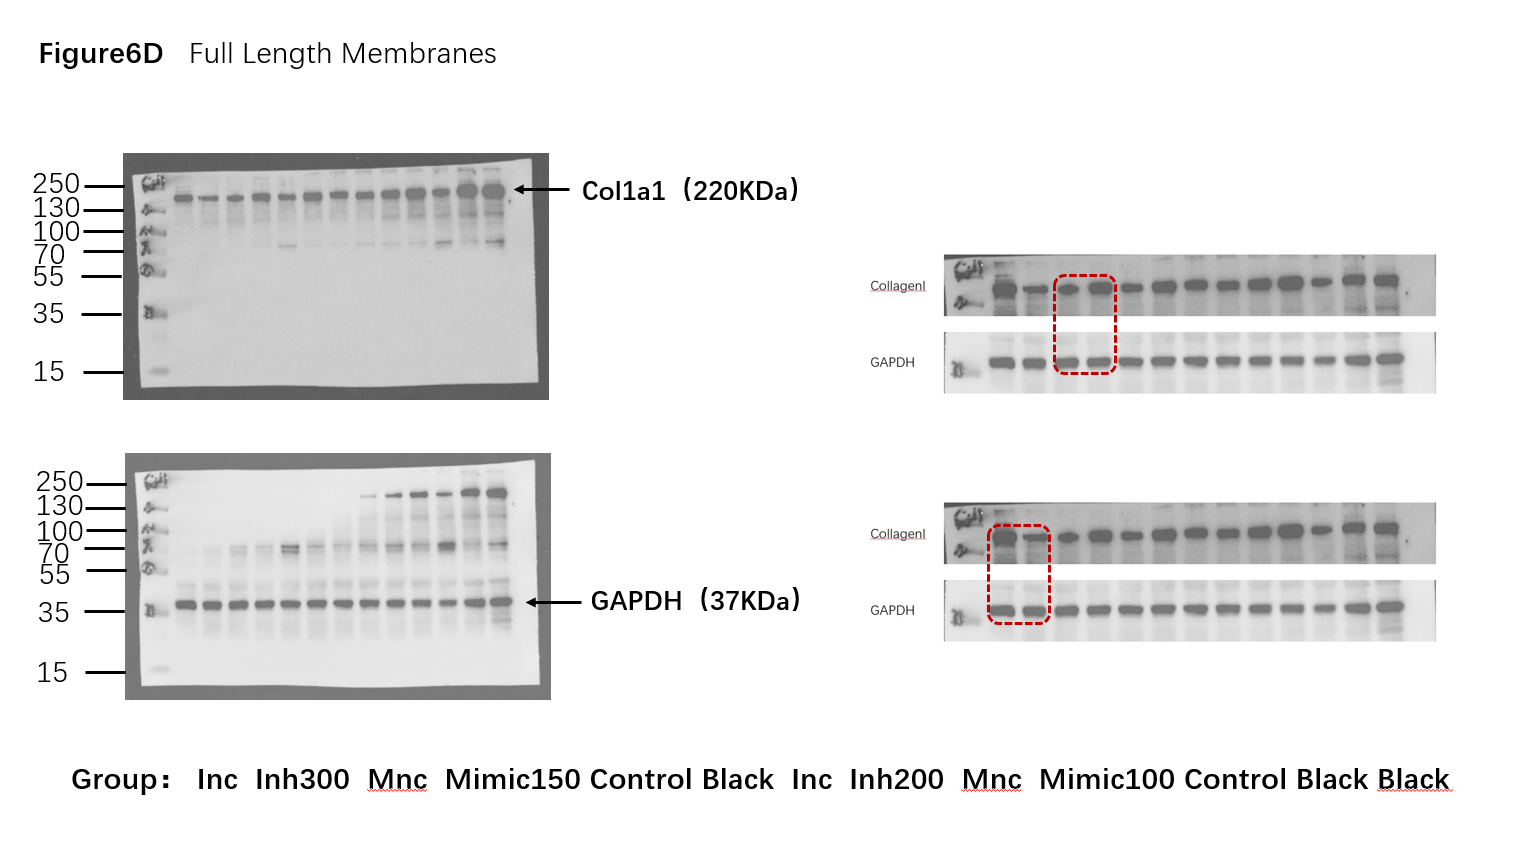

Supplement: Supplementary file 2 [file 65ec9ccd42b2c26878376c38.docx]
